# Supplementary material for: Modulating the oxygen evolution reaction activity of SrIrO3/Pb(Mg1/3Nb2/3)0.7Ti0.3O3 catalysts using electric-field polarization
Source: Royal Society of Chemistry journal article supplement (doi:10.1039/d3cp01877f), 2023-01-01
Supplement: d3cp01877f1.pdf [file d3cp01877f1.pdf]

## Supporting Information

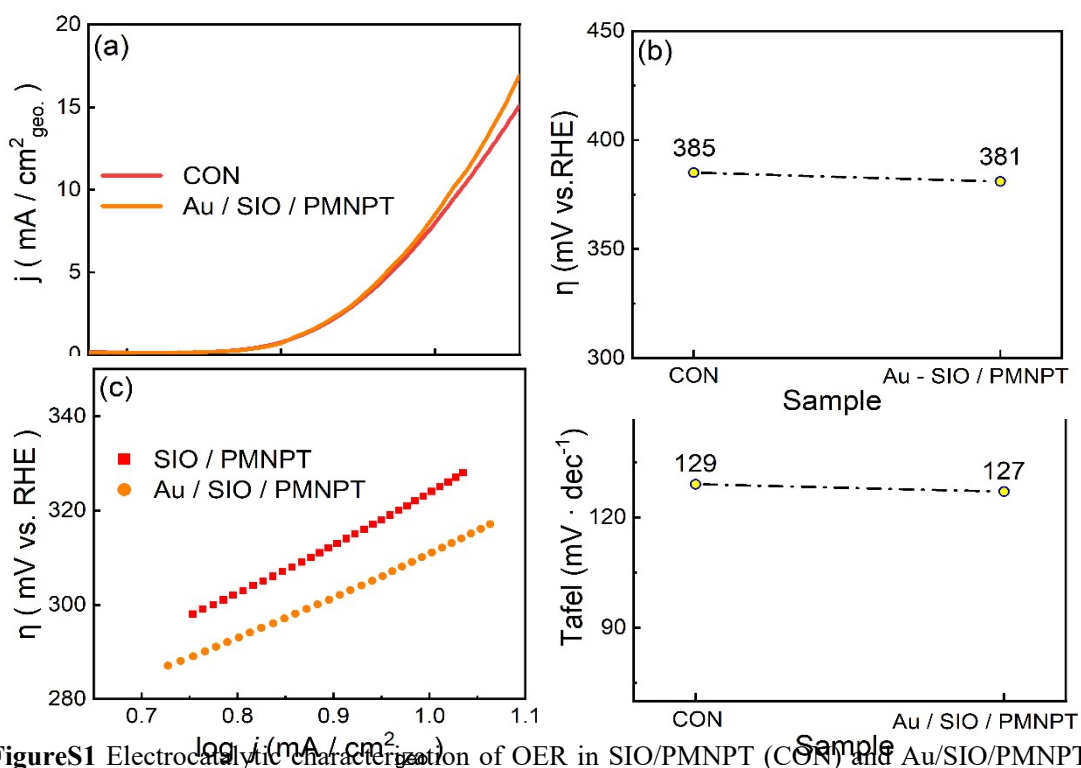

**Figure S1** Electrochemical characterization of OER in SIO/PMNPT (CON) and Au/SIO/PMNPT samples. (a) LSV curve when a scanning rate of 5 mV/s. (b) Overpotential at  $\eta_{j=10}$ . (c) Tafel diagram, (d) Tafel slope.
